# Supplementary material
Source: MDPI journal article supplement (https://www.mdpi.com/1999-4907/12/6/732)
Supplement: s1 [file s1]

**Table S1.** Bulk density (BD) and total organic carbon (TOC) in the undrained peat forests.

| Author                | Site        | Location        | Land Use | Depth (cm) | BD<br>(g cm <sup>-3</sup> ) | TOC (%) |
|-----------------------|-------------|-----------------|----------|------------|-----------------------------|---------|
| Anshari (unpublished) | Lake Siawan | West Kalimantan | Forest   | 0-50       | 0.11                        | 54.96   |
| Anshari (unpublished) | Lake Siawan | West Kalimantan | Forest   | 0-50       | 0.07                        | 55.25   |
| Anshari (unpublished) | Lake Siawan | West Kalimantan | Forest   | 0-50       | 0.07                        | 55.67   |
| Anshari (unpublished) | Lake Siawan | West Kalimantan | Forest   | 0-50       | 0.04                        | 52.57   |
| Anshari (unpublished) | Lake Siawan | West Kalimantan | Forest   | 0-50       | 0.05                        | 53.49   |
| Anshari (unpublished) | Lake Siawan | West Kalimantan | Forest   | 0-50       | 0.02                        | 46.36   |
| Anshari (unpublished) | Lake Siawan | West Kalimantan | Forest   | 0-50       | 0.02                        | 47.57   |
| Anshari (unpublished) | Lake Siawan | West Kalimantan | Forest   | 0-50       | 0.10                        | 48.78   |
| Anshari (unpublished) | Lake Siawan | West Kalimantan | Forest   | 0-50       | 0.27                        | 48.28   |
| Anshari (unpublished) | Lake Siawan | West Kalimantan | Forest   | 0-50       | 0.06                        | 47.95   |
| Anshari (unpublished) | Lake Siawan | West Kalimantan | Forest   | 0-50       | 0.02                        | 47.95   |
| Anshari (unpublished) | Lake Siawan | West Kalimantan | Forest   | 0-50       | 0.02                        | 48.52   |
| Anshari (unpublished) | Lake Siawan | West Kalimantan | Forest   | 0-50       | 0.03                        | 50.65   |
| Anshari (unpublished) | Lake Siawan | West Kalimantan | Forest   | 0-50       | 0.03                        | 50.29   |
| Anshari (unpublished) | Lake Siawan | West Kalimantan | Forest   | 0-50       | 0.09                        | 49.58   |
| Anshari (unpublished) | Lake Siawan | West Kalimantan | Forest   | 0-50       | 0.08                        | 47.16   |
| Anshari (unpublished) | Lake Siawan | West Kalimantan | Forest   | 0-50       | 0.07                        | 44.50   |
| Anshari (unpublished) | Lake Siawan | West Kalimantan | Forest   | 0-50       | 0.08                        | 47.33   |
| Anshari (unpublished) | Lake Siawan | West Kalimantan | Forest   | 0-50       | 0.10                        | 48.43   |
| Anshari (unpublished) | Lake Siawan | West Kalimantan | Forest   | 0-50       | 0.08                        | 48.38   |
| Anshari (unpublished) | Lake Siawan | West Kalimantan | Forest   | 0-50       | 0.22                        | 52.21   |
| Anshari (unpublished) | Lake Siawan | West Kalimantan | Forest   | 0-50       | 0.21                        | 53.39   |
| Anshari (unpublished) | Lake Siawan | West Kalimantan | Forest   | 0-50       | 0.18                        | 53.99   |
| Anshari (unpublished) | Lake Siawan | West Kalimantan | Forest   | 0-50       | 0.14                        | 53.90   |
| Anshari (unpublished) | Lake Siawan | West Kalimantan | Forest   | 0-50       | 0.12                        | 53.80   |
| Anshari (unpublished) | Lake Siawan | West Kalimantan | Forest   | 0-50       | 0.03                        | 45.86   |
| Anshari (unpublished) | Lake Siawan | West Kalimantan | Forest   | 0-50       | 0.06                        | 46.99   |
| Anshari (unpublished) | Lake Siawan | West Kalimantan | Forest   | 0-50       | 0.10                        | 47.71   |
| Anshari (unpublished) | Lake Siawan | West Kalimantan | Forest   | 0-50       | 0.08                        | 46.50   |
| Anshari (unpublished) | Lake Siawan | West Kalimantan | Forest   | 0-50       | 0.06                        | 46.50   |
| Anshari (unpublished) | Lake Siawan | West Kalimantan | Forest   | 0-50       | 0.26                        | 51.03   |
| Anshari (unpublished) | Lake Siawan | West Kalimantan | Forest   | 0-50       | 0.27                        | 52.62   |
| Anshari (unpublished) | Lake Siawan | West Kalimantan | Forest   | 0-50       | 0.25                        | 52.40   |
| Anshari (unpublished) | Lake Siawan | West Kalimantan | Forest   | 0-50       | 0.24                        | 52.46   |
| Anshari (unpublished) | Lake Siawan | West Kalimantan | Forest   | 0-50       | 0.19                        | 52.38   |
| Anshari (unpublished) | Lake Siawan | West Kalimantan | Forest   | 0-50       | 0.09                        | 52.23   |
| Anshari (unpublished) | Lake Siawan | West Kalimantan | Forest   | 0-50       | 0.12                        | 54.98   |
| Anshari (unpublished) | Lake Siawan | West Kalimantan | Forest   | 0-50       | 0.12                        | 51.75   |
| Anshari (unpublished) | Lake Siawan | West Kalimantan | Forest   | 0-50       | 0.13                        | 51.76   |

| Author                | Site        | Location           | Land Use | Depth (cm) | BD<br>(g cm <sup>-3</sup> ) | TOC (%) |
|-----------------------|-------------|--------------------|----------|------------|-----------------------------|---------|
| Anshari (unpublished) | Lake Siawan | West Kalimantan    | Forest   | 0-50       | 0.17                        | 55.54   |
| Anshari (unpublished) | Lake Siawan | West Kalimantan    | Forest   | 0-50       | 0.10                        | 54.00   |
| Anshari (unpublished) | Lake Siawan | West Kalimantan    | Forest   | 0-50       | 0.10                        | 53.39   |
| Anshari (unpublished) | Lake Siawan | West Kalimantan    | Forest   | 0-50       | 0.09                        | 53.31   |
| Anshari (unpublished) | Lake Siawan | West Kalimantan    | Forest   | 0-50       | 0.08                        | 53.02   |
| Anshari (unpublished) | Lake Siawan | West Kalimantan    | Forest   | 0-50       | 0.08                        | 53.25   |
| Page et al_ 2004      | Sebangau NP | Central Kalimantan | Forest   | 50-100     | 0.08                        | 50.91   |
| Page et al_ 2004      | Sebangau NP | Central Kalimantan | Forest   | 50-100     | 0.18                        | 54.20   |
| Anshari (unpublished) | Lake Siawan | West Kalimantan    | Forest   | 50-100     | 0.12                        | 52.01   |
| Anshari (unpublished) | Lake Siawan | West Kalimantan    | Forest   | 50-100     | 0.13                        | 52.01   |
| Anshari (unpublished) | Lake Siawan | West Kalimantan    | Forest   | 50-100     | 0.06                        | 48.84   |
| Anshari (unpublished) | Lake Siawan | West Kalimantan    | Forest   | 50-100     | 0.10                        | 52.01   |
| Anshari (unpublished) | Lake Siawan | West Kalimantan    | Forest   | 50-100     | 0.04                        | 52.44   |
| Anshari (unpublished) | Lake Siawan | West Kalimantan    | Forest   | 50-100     | 0.08                        | 48.90   |
| Anshari (unpublished) | Lake Siawan | West Kalimantan    | Forest   | 50-100     | 0.08                        | 49.00   |
| Anshari (unpublished) | Lake Siawan | West Kalimantan    | Forest   | 50-100     | 0.07                        | 51.05   |
| Anshari (unpublished) | Lake Siawan | West Kalimantan    | Forest   | 50-100     | 0.13                        | 52.29   |
| Anshari (unpublished) | Lake Siawan | West Kalimantan    | Forest   | 50-100     | 0.12                        | 50.78   |
| Anshari (unpublished) | Lake Siawan | West Kalimantan    | Forest   | 50-100     | 0.07                        | 53.30   |
| Anshari (unpublished) | Lake Siawan | West Kalimantan    | Forest   | 50-100     | 0.18                        | 51.16   |
| Anshari (unpublished) | Lake Siawan | West Kalimantan    | Forest   | 50-100     | 0.07                        | 53.11   |
| Anshari (unpublished) | Lake Siawan | West Kalimantan    | Forest   | 50-100     | 0.04                        | 53.02   |
| Anshari (unpublished) | Lake Siawan | West Kalimantan    | Forest   | 50-100     | 0.09                        | 54.09   |
| Anshari (unpublished) | Lake Siawan | West Kalimantan    | Forest   | 50-100     | 0.10                        | 54.09   |
| Anshari (unpublished) | Lake Siawan | West Kalimantan    | Forest   | 50-100     | 0.09                        | 52.06   |
| Anshari (unpublished) | Lake Siawan | West Kalimantan    | Forest   | 50-100     | 0.09                        | 50.10   |
| Anshari (unpublished) | Lake Siawan | West Kalimantan    | Forest   | 50-100     | 0.05                        | 47.71   |
| Anshari (unpublished) | Lake Siawan | West Kalimantan    | Forest   | 50-100     | 0.06                        | 47.45   |
| Anshari (unpublished) | Lake Siawan | West Kalimantan    | Forest   | 50-100     | 0.13                        | 52.90   |
| Anshari (unpublished) | Lake Siawan | West Kalimantan    | Forest   | 50-100     | 0.08                        | 48.21   |
| Anshari (unpublished) | Lake Siawan | West Kalimantan    | Forest   | 50-100     | 0.09                        | 47.52   |
| Anshari (unpublished) | Lake Siawan | West Kalimantan    | Forest   | 50-100     | 0.10                        | 53.98   |
| Anshari (unpublished) | Lake Siawan | West Kalimantan    | Forest   | 50-100     | 0.11                        | 53.66   |
| Anshari (unpublished) | Lake Siawan | West Kalimantan    | Forest   | 50-100     | 0.11                        | 53.93   |
| Anshari (unpublished) | Lake Siawan | West Kalimantan    | Forest   | 50-100     | 0.13                        | 53.50   |
| Anshari (unpublished) | Lake Siawan | West Kalimantan    | Forest   | 50-100     | 0.14                        | 53.35   |
| Anshari (unpublished) | Lake Siawan | West Kalimantan    | Forest   | 50-100     | 0.08                        | 47.27   |
| Anshari (unpublished) | Lake Siawan | West Kalimantan    | Forest   | 50-100     | 0.09                        | 47.77   |
| Anshari (unpublished) | Lake Siawan | West Kalimantan    | Forest   | 50-100     | 0.09                        | 47.08   |
| Anshari (unpublished) | Lake Siawan | West Kalimantan    | Forest   | 50-100     | 0.12                        | 47.15   |
| Anshari (unpublished) | Lake Siawan | West Kalimantan    | Forest   | 50-100     | 0.10                        | 45.08   |
| Anshari (unpublished) | Lake Siawan | West Kalimantan    | Forest   | 50-100     | 0.22                        | 52.20   |

| Author                | Site        | Location           | Land Use | Depth (cm) | BD<br>(g cm <sup>-3</sup> ) | TOC (%) |
|-----------------------|-------------|--------------------|----------|------------|-----------------------------|---------|
| Anshari (unpublished) | Lake Siawan | West Kalimantan    | Forest   | 50-100     | 0.18                        | 52.47   |
| Anshari (unpublished) | Lake Siawan | West Kalimantan    | Forest   | 50-100     | 0.17                        | 51.70   |
| Anshari (unpublished) | Lake Siawan | West Kalimantan    | Forest   | 50-100     | 0.17                        | 51.99   |
| Anshari (unpublished) | Lake Siawan | West Kalimantan    | Forest   | 50-100     | 0.18                        | 51.69   |
| Anshari (unpublished) | Lake Siawan | West Kalimantan    | Forest   | 50-100     | 0.06                        | 53.97   |
| Anshari (unpublished) | Lake Siawan | West Kalimantan    | Forest   | 50-100     | 0.09                        | 53.56   |
| Anshari (unpublished) | Lake Siawan | West Kalimantan    | Forest   | 50-100     | 0.09                        | 53.07   |
| Anshari (unpublished) | Lake Siawan | West Kalimantan    | Forest   | 50-100     | 0.16                        | 53.74   |
| Anshari (unpublished) | Lake Siawan | West Kalimantan    | Forest   | 50-100     | 0.13                        | 52.24   |
| Anshari (unpublished) | Lake Siawan | West Kalimantan    | Forest   | 50-100     | 0.07                        | 53.89   |
| Anshari (unpublished) | Lake Siawan | West Kalimantan    | Forest   | 50-100     | 0.10                        | 53.42   |
| Anshari (unpublished) | Lake Siawan | West Kalimantan    | Forest   | 50-100     | 0.15                        | 55.67   |
| Page et al 2004       | Sebangau NP | Central Kalimantan | Forest   | 100-150    | 0.13                        | 55.50   |
| Page et al 2004       | Sebangau NP | Central Kalimantan | Forest   | 100-150    | 0.10                        | 57.60   |
| Page et al 2004       | Sebangau NP | Central Kalimantan | Forest   | 100-150    | 0.12                        | 58.20   |
| Anshari (unpublished) | Lake Siawan | West Kalimantan    | Forest   | 100-150    | 0.08                        | 53.46   |
| Anshari (unpublished) | Lake Siawan | West Kalimantan    | Forest   | 100-150    | 0.07                        | 53.21   |
| Anshari (unpublished) | Lake Siawan | West Kalimantan    | Forest   | 100-150    | 0.08                        | 51.88   |
| Anshari (unpublished) | Lake Siawan | West Kalimantan    | Forest   | 100-150    | 0.09                        | 51.59   |
| Anshari (unpublished) | Lake Siawan | West Kalimantan    | Forest   | 100-150    | 0.08                        | 51.43   |
| Anshari (unpublished) | Lake Siawan | West Kalimantan    | Forest   | 100-150    | 0.13                        | 51.08   |
| Anshari (unpublished) | Lake Siawan | West Kalimantan    | Forest   | 100-150    | 0.05                        | 52.69   |
| Anshari (unpublished) | Lake Siawan | West Kalimantan    | Forest   | 100-150    | 0.06                        | 52.66   |
| Anshari (unpublished) | Lake Siawan | West Kalimantan    | Forest   | 100-150    | 0.07                        | 51.54   |
| Anshari (unpublished) | Lake Siawan | West Kalimantan    | Forest   | 100-150    | 0.10                        | 55.56   |
| Anshari (unpublished) | Lake Siawan | West Kalimantan    | Forest   | 100-150    | 0.12                        | 52.39   |
| Anshari (unpublished) | Lake Siawan | West Kalimantan    | Forest   | 100-150    | 0.25                        | 55.08   |
| Anshari (unpublished) | Lake Siawan | West Kalimantan    | Forest   | 100-150    | 0.20                        | 55.42   |
| Anshari (unpublished) | Lake Siawan | West Kalimantan    | Forest   | 100-150    | 0.09                        | 53.57   |
| Anshari (unpublished) | Lake Siawan | West Kalimantan    | Forest   | 100-150    | 0.12                        | 55.82   |
| Anshari (unpublished) | Lake Siawan | West Kalimantan    | Forest   | 100-150    | 0.08                        | 53.17   |
| Anshari (unpublished) | Lake Siawan | West Kalimantan    | Forest   | 100-150    | 0.15                        | 53.01   |
| Anshari (unpublished) | Lake Siawan | West Kalimantan    | Forest   | 100-150    | 0.10                        | 53.04   |
| Anshari (unpublished) | Lake Siawan | West Kalimantan    | Forest   | 100-150    | 0.10                        | 53.43   |
| Anshari (unpublished) | Lake Siawan | West Kalimantan    | Forest   | 100-150    | 0.13                        | 52.97   |
| Anshari (unpublished) | Lake Siawan | West Kalimantan    | Forest   | 100-150    | 0.11                        | 52.56   |
| Anshari (unpublished) | Lake Siawan | West Kalimantan    | Forest   | 100-150    | 0.12                        | 53.09   |
| Anshari (unpublished) | Lake Siawan | West Kalimantan    | Forest   | 100-150    | 0.11                        | 52.53   |
| Anshari (unpublished) | Lake Siawan | West Kalimantan    | Forest   | 100-150    | 0.12                        | 52.39   |
| Anshari (unpublished) | Lake Siawan | West Kalimantan    | Forest   | 100-150    | 0.12                        | 47.04   |
| Anshari (unpublished) | Lake Siawan | West Kalimantan    | Forest   | 100-150    | 0.10                        | 47.05   |
| Anshari (unpublished) | Lake Siawan | West Kalimantan    | Forest   | 100-150    | 0.10                        | 47.66   |

| Author                | Site        | Location           | Land Use | Depth (cm) | BD<br>(g cm <sup>-3</sup> ) | TOC (%) |
|-----------------------|-------------|--------------------|----------|------------|-----------------------------|---------|
| Anshari (unpublished) | Lake Siawan | West Kalimantan    | Forest   | 100-150    | 0.10                        | 47.10   |
| Anshari (unpublished) | Lake Siawan | West Kalimantan    | Forest   | 100-150    | 0.10                        | 46.23   |
| Anshari (unpublished) | Lake Siawan | West Kalimantan    | Forest   | 100-150    | 0.17                        | 51.11   |
| Anshari (unpublished) | Lake Siawan | West Kalimantan    | Forest   | 100-150    | 0.18                        | 51.26   |
| Anshari (unpublished) | Lake Siawan | West Kalimantan    | Forest   | 100-150    | 0.17                        | 51.27   |
| Anshari (unpublished) | Lake Siawan | West Kalimantan    | Forest   | 100-150    | 0.21                        | 52.39   |
| Anshari (unpublished) | Lake Siawan | West Kalimantan    | Forest   | 100-150    | 0.13                        | 51.82   |
| Anshari (unpublished) | Lake Siawan | West Kalimantan    | Forest   | 100-150    | 0.17                        | 51.36   |
| Anshari (unpublished) | Lake Siawan | West Kalimantan    | Forest   | 100-150    | 0.16                        | 54.52   |
| Anshari (unpublished) | Lake Siawan | West Kalimantan    | Forest   | 100-150    | 0.18                        | 52.30   |
| Anshari (unpublished) | Lake Siawan | West Kalimantan    | Forest   | 100-150    | 0.12                        | 52.19   |
| Anshari (unpublished) | Lake Siawan | West Kalimantan    | Forest   | 100-150    | 0.43                        | 54.00   |
| Anshari (unpublished) | Lake Siawan | West Kalimantan    | Forest   | 100-150    | 0.16                        | 53.17   |
| Anshari (unpublished) | Lake Siawan | West Kalimantan    | Forest   | 100-150    | 0.12                        | 54.57   |
| Page et al 2004       | Sebangau NP | Central Kalimantan | Forest   | 150-200    | 0.15                        | 57.40   |
| Page et al 2004       | Sebangau NP | Central Kalimantan | Forest   | 150-200    | 0.06                        | 54.70   |
| Anshari (unpublished) | Lake Siawan | West Kalimantan    | Forest   | 150-200    | 0.08                        | 51.78   |
| Anshari (unpublished) | Lake Siawan | West Kalimantan    | Forest   | 150-200    | 0.09                        | 50.34   |
| Anshari (unpublished) | Lake Siawan | West Kalimantan    | Forest   | 150-200    | 0.08                        | 49.27   |
| Anshari (unpublished) | Lake Siawan | West Kalimantan    | Forest   | 150-200    | 0.09                        | 49.41   |
| Anshari (unpublished) | Lake Siawan | West Kalimantan    | Forest   | 150-200    | 0.09                        | 48.58   |
| Anshari (unpublished) | Lake Siawan | West Kalimantan    | Forest   | 150-200    | 0.07                        | 58.60   |
| Anshari (unpublished) | Lake Siawan | West Kalimantan    | Forest   | 150-200    | 0.09                        | 55.43   |
| Anshari (unpublished) | Lake Siawan | West Kalimantan    | Forest   | 150-200    | 0.07                        | 55.15   |
| Anshari (unpublished) | Lake Siawan | West Kalimantan    | Forest   | 150-200    | 0.05                        | 54.01   |
| Anshari (unpublished) | Lake Siawan | West Kalimantan    | Forest   | 150-200    | 0.06                        | 56.83   |
| Anshari (unpublished) | Lake Siawan | West Kalimantan    | Forest   | 150-200    | 0.15                        | 54.97   |
| Anshari (unpublished) | Lake Siawan | West Kalimantan    | Forest   | 150-200    | 0.17                        | 54.65   |
| Anshari (unpublished) | Lake Siawan | West Kalimantan    | Forest   | 150-200    | 0.17                        | 53.51   |
| Anshari (unpublished) | Lake Siawan | West Kalimantan    | Forest   | 150-200    | 0.19                        | 53.69   |
| Anshari (unpublished) | Lake Siawan | West Kalimantan    | Forest   | 150-200    | 0.15                        | 53.33   |
| Anshari (unpublished) | Lake Siawan | West Kalimantan    | Forest   | 150-200    | 0.07                        | 51.99   |
| Anshari (unpublished) | Lake Siawan | West Kalimantan    | Forest   | 150-200    | 0.07                        | 52.05   |
| Anshari (unpublished) | Lake Siawan | West Kalimantan    | Forest   | 150-200    | 0.09                        | 52.04   |
| Anshari (unpublished) | Lake Siawan | West Kalimantan    | Forest   | 150-200    | 0.08                        | 50.80   |
| Anshari (unpublished) | Lake Siawan | West Kalimantan    | Forest   | 150-200    | 0.13                        | 53.29   |
| Anshari (unpublished) | Lake Siawan | West Kalimantan    | Forest   | 150-200    | 0.09                        | 52.61   |
| Anshari (unpublished) | Lake Siawan | West Kalimantan    | Forest   | 150-200    | 0.10                        | 52.78   |
| Anshari (unpublished) | Lake Siawan | West Kalimantan    | Forest   | 150-200    | 0.12                        | 53.16   |
| Anshari (unpublished) | Lake Siawan | West Kalimantan    | Forest   | 150-200    | 0.13                        | 53.24   |
| Anshari (unpublished) | Lake Siawan | West Kalimantan    | Forest   | 150-200    | 0.12                        | 52.43   |
| Anshari (unpublished) | Lake Siawan | West Kalimantan    | Forest   | 150-200    | 0.07                        | 46.33   |

| Author                | Site        | Location           | Land Use | Depth (cm) | BD<br>(g cm <sup>-3</sup> ) | TOC (%) |
|-----------------------|-------------|--------------------|----------|------------|-----------------------------|---------|
| Anshari (unpublished) | Lake Siawan | West Kalimantan    | Forest   | 150-200    | 0.09                        | 47.50   |
| Anshari (unpublished) | Lake Siawan | West Kalimantan    | Forest   | 150-200    | 0.10                        | 44.87   |
| Anshari (unpublished) | Lake Siawan | West Kalimantan    | Forest   | 150-200    | 0.14                        | 45.76   |
| Anshari (unpublished) | Lake Siawan | West Kalimantan    | Forest   | 150-200    | 0.18                        | 52.22   |
| Anshari (unpublished) | Lake Siawan | West Kalimantan    | Forest   | 150-200    | 0.19                        | 51.17   |
| Anshari (unpublished) | Lake Siawan | West Kalimantan    | Forest   | 150-200    | 0.19                        | 51.45   |
| Anshari (unpublished) | Lake Siawan | West Kalimantan    | Forest   | 150-200    | 0.18                        | 51.19   |
| Anshari (unpublished) | Lake Siawan | West Kalimantan    | Forest   | 150-200    | 0.18                        | 50.33   |
| Anshari (unpublished) | Lake Siawan | West Kalimantan    | Forest   | 150-200    | 0.27                        | 52.88   |
| Anshari (unpublished) | Lake Siawan | West Kalimantan    | Forest   | 150-200    | 0.31                        | 54.73   |
| Anshari (unpublished) | Lake Siawan | West Kalimantan    | Forest   | 150-200    | 0.28                        | 54.70   |
| Anshari (unpublished) | Lake Siawan | West Kalimantan    | Forest   | 150-200    | 0.24                        | 54.85   |
| Anshari (unpublished) | Lake Siawan | West Kalimantan    | Forest   | 150-200    | 0.20                        | 54.24   |
| Anshari (unpublished) | Lake Siawan | West Kalimantan    | Forest   | 150-200    | 0.17                        | 53.09   |
| Anshari (unpublished) | Lake Siawan | West Kalimantan    | Forest   | 150-200    | 0.13                        | 52.67   |
| Anshari (unpublished) | Lake Siawan | West Kalimantan    | Forest   | 150-200    | 0.15                        | 52.75   |
| Anshari (unpublished) | Lake Siawan | West Kalimantan    | Forest   | 150-200    | 0.17                        | 53.76   |
| Anshari (unpublished) | Lake Siawan | West Kalimantan    | Forest   | 150-200    | 0.18                        | 52.41   |
| Page et al 2004       | Sebangau NP | Central Kalimantan | Forest   | 200-250    | 0.09                        | 56.20   |
| Page et al 2004       | Sebangau NP | Central Kalimantan | Forest   | 200-250    | 0.10                        | 55.80   |
| Page et al 2004       | Sebangau NP | Central Kalimantan | Forest   | 200-250    | 0.11                        | 55.50   |
| Anshari (unpublished) | Lake Siawan | West Kalimantan    | Forest   | 200-250    | 0.08                        | 54.02   |
| Anshari (unpublished) | Lake Siawan | West Kalimantan    | Forest   | 200-250    | 0.08                        | 53.48   |
| Anshari (unpublished) | Lake Siawan | West Kalimantan    | Forest   | 200-250    | 0.11                        | 52.62   |
| Anshari (unpublished) | Lake Siawan | West Kalimantan    | Forest   | 200-250    | 0.09                        | 53.24   |
| Anshari (unpublished) | Lake Siawan | West Kalimantan    | Forest   | 200-250    | 0.08                        | 55.03   |
| Anshari (unpublished) | Lake Siawan | West Kalimantan    | Forest   | 200-250    | 0.05                        | 55.03   |
| Anshari (unpublished) | Lake Siawan | West Kalimantan    | Forest   | 200-250    | 0.06                        | 55.55   |
| Anshari (unpublished) | Lake Siawan | West Kalimantan    | Forest   | 200-250    | 0.06                        | 54.43   |
| Anshari (unpublished) | Lake Siawan | West Kalimantan    | Forest   | 200-250    | 0.09                        | 53.43   |
| Anshari (unpublished) | Lake Siawan | West Kalimantan    | Forest   | 200-250    | 0.12                        | 51.70   |
| Anshari (unpublished) | Lake Siawan | West Kalimantan    | Forest   | 200-250    | 0.13                        | 52.06   |
| Anshari (unpublished) | Lake Siawan | West Kalimantan    | Forest   | 200-250    | 0.16                        | 51.79   |
| Anshari (unpublished) | Lake Siawan | West Kalimantan    | Forest   | 200-250    | 0.13                        | 52.81   |
| Anshari (unpublished) | Lake Siawan | West Kalimantan    | Forest   | 200-250    | 0.11                        | 50.77   |
| Anshari (unpublished) | Lake Siawan | West Kalimantan    | Forest   | 200-250    | 0.12                        | 53.74   |
| Anshari (unpublished) | Lake Siawan | West Kalimantan    | Forest   | 200-250    | 0.13                        | 53.20   |
| Anshari (unpublished) | Lake Siawan | West Kalimantan    | Forest   | 200-250    | 0.13                        | 53.94   |
| Anshari (unpublished) | Lake Siawan | West Kalimantan    | Forest   | 200-250    | 0.13                        | 53.87   |
| Anshari (unpublished) | Lake Siawan | West Kalimantan    | Forest   | 200-250    | 0.12                        | 53.29   |
| Anshari (unpublished) | Lake Siawan | West Kalimantan    | Forest   | 200-250    | 0.14                        | 49.89   |
| Anshari (unpublished) | Lake Siawan | West Kalimantan    | Forest   | 200-250    | 0.14                        | 49.82   |

| Author                | Site        | Location           | Land Use | Depth (cm) | BD<br>(g cm <sup>-3</sup> ) | TOC (%) |
|-----------------------|-------------|--------------------|----------|------------|-----------------------------|---------|
| Anshari (unpublished) | Lake Siawan | West Kalimantan    | Forest   | 200-250    | 0.15                        | 50.29   |
| Anshari (unpublished) | Lake Siawan | West Kalimantan    | Forest   | 200-250    | 0.13                        | 50.48   |
| Anshari (unpublished) | Lake Siawan | West Kalimantan    | Forest   | 200-250    | 0.12                        | 50.45   |
| Anshari (unpublished) | Lake Siawan | West Kalimantan    | Forest   | 200-250    | 0.24                        | 53.79   |
| Anshari (unpublished) | Lake Siawan | West Kalimantan    | Forest   | 200-250    | 0.28                        | 54.69   |
| Anshari (unpublished) | Lake Siawan | West Kalimantan    | Forest   | 200-250    | 0.23                        | 53.16   |
| Anshari (unpublished) | Lake Siawan | West Kalimantan    | Forest   | 200-250    | 0.16                        | 53.16   |
| Anshari (unpublished) | Lake Siawan | West Kalimantan    | Forest   | 200-250    | 0.15                        | 52.06   |
| Anshari (unpublished) | Lake Siawan | West Kalimantan    | Forest   | 200-250    | 0.19                        | 52.75   |
| Anshari (unpublished) | Lake Siawan | West Kalimantan    | Forest   | 200-250    | 0.18                        | 52.66   |
| Anshari (unpublished) | Lake Siawan | West Kalimantan    | Forest   | 200-250    | 0.19                        | 51.93   |
| Anshari (unpublished) | Lake Siawan | West Kalimantan    | Forest   | 200-250    | 0.16                        | 52.12   |
| Anshari (unpublished) | Lake Siawan | West Kalimantan    | Forest   | 200-250    | 0.17                        | 52.03   |
| Anshari (unpublished) | Lake Siawan | West Kalimantan    | Forest   | 200-250    | 0.04                        | 54.17   |
| Page et al 2004       | Sebangau NP | Central Kalimantan | Forest   | 250-300    | 0.10                        | 55.70   |
| Page et al 2004       | Sebangau NP | Central Kalimantan | Forest   | 250-300    | 0.08                        | 55.90   |
| Anshari (unpublished) | Lake Siawan | West Kalimantan    | Forest   | 250-300    | 0.08                        | 52.50   |
| Anshari (unpublished) | Lake Siawan | West Kalimantan    | Forest   | 250-300    | 0.08                        | 53.40   |
| Anshari (unpublished) | Lake Siawan | West Kalimantan    | Forest   | 250-300    | 0.07                        | 52.75   |
| Anshari (unpublished) | Lake Siawan | West Kalimantan    | Forest   | 250-300    | 0.09                        | 53.98   |
| Anshari (unpublished) | Lake Siawan | West Kalimantan    | Forest   | 250-300    | 0.06                        | 54.02   |
| Anshari (unpublished) | Lake Siawan | West Kalimantan    | Forest   | 250-300    | 0.05                        | 56.08   |
| Anshari (unpublished) | Lake Siawan | West Kalimantan    | Forest   | 250-300    | 0.05                        | 54.98   |
| Anshari (unpublished) | Lake Siawan | West Kalimantan    | Forest   | 250-300    | 0.03                        | 53.29   |
| Anshari (unpublished) | Lake Siawan | West Kalimantan    | Forest   | 250-300    | 0.03                        | 52.68   |
| Anshari (unpublished) | Lake Siawan | West Kalimantan    | Forest   | 250-300    | 0.07                        | 55.30   |
| Anshari (unpublished) | Lake Siawan | West Kalimantan    | Forest   | 250-300    | 0.12                        | 51.22   |
| Anshari (unpublished) | Lake Siawan | West Kalimantan    | Forest   | 250-300    | 0.13                        | 50.30   |
| Anshari (unpublished) | Lake Siawan | West Kalimantan    | Forest   | 250-300    | 0.15                        | 50.54   |
| Anshari (unpublished) | Lake Siawan | West Kalimantan    | Forest   | 250-300    | 0.13                        | 50.35   |
| Anshari (unpublished) | Lake Siawan | West Kalimantan    | Forest   | 250-300    | 0.13                        | 53.78   |
| Anshari (unpublished) | Lake Siawan | West Kalimantan    | Forest   | 250-300    | 0.13                        | 53.85   |
| Anshari (unpublished) | Lake Siawan | West Kalimantan    | Forest   | 250-300    | 0.13                        | 53.56   |
| Anshari (unpublished) | Lake Siawan | West Kalimantan    | Forest   | 250-300    | 0.12                        | 53.46   |
| Anshari (unpublished) | Lake Siawan | West Kalimantan    | Forest   | 250-300    | 0.13                        | 53.96   |
| Anshari (unpublished) | Lake Siawan | West Kalimantan    | Forest   | 250-300    | 0.16                        | 50.44   |
| Anshari (unpublished) | Lake Siawan | West Kalimantan    | Forest   | 250-300    | 0.20                        | 49.24   |
| Anshari (unpublished) | Lake Siawan | West Kalimantan    | Forest   | 250-300    | 0.16                        | 52.51   |
| Anshari (unpublished) | Lake Siawan | West Kalimantan    | Forest   | 250-300    | 0.12                        | 51.09   |
| Anshari (unpublished) | Lake Siawan | West Kalimantan    | Forest   | 250-300    | 0.10                        | 50.79   |
| Anshari (unpublished) | Lake Siawan | West Kalimantan    | Forest   | 250-300    | 0.13                        | 51.15   |
| Anshari (unpublished) | Lake Siawan | West Kalimantan    | Forest   | 250-300    | 0.13                        | 52.66   |

| Author                | Site        | Location          | Land Use | Depth (cm) | BD<br>(g cm <sup>-3</sup> ) | TOC (%) |
|-----------------------|-------------|-------------------|----------|------------|-----------------------------|---------|
| Anshari (unpublished) | Lake Siawan | West Kalimantan   | Forest   | 250-300    | 0.14                        | 52.19   |
| Anshari (unpublished) | Lake Siawan | West Kalimantan   | Forest   | 250-300    | 0.14                        | 51.85   |
| Anshari (unpublished) | Lake Siawan | West Kalimantan   | Forest   | 250-300    | 0.15                        | 51.59   |
| Anshari (unpublished) | Lake Siawan | West Kalimantan   | Forest   | 250-300    | 0.17                        | 51.38   |
| Anshari (unpublished) | Lake Siawan | West Kalimantan   | Forest   | 250-300    | 0.19                        | 51.50   |
| Anshari (unpublished) | Lake Siawan | West Kalimantan   | Forest   | 250-300    | 0.21                        | 52.05   |
| Cameron et al 1989    | Jambi       | Batang Hari River | Forest   | 50-100     | 0.08                        | 43.90   |
| Cameron et al 1989    | Jambi       | Batang Hari River | Forest   | 100-150    | 0.08                        | 54.40   |
| Cameron et al 1989    | Jambi       | Batang Hari River | Forest   | 100-150    | 0.08                        | 61.90   |
| Cameron et al 1989    | Jambi       | Batang Hari River | Forest   | 150-200    | 0.08                        | 60.30   |

**Table S2.** Bulk density (BD) and total organic carbon (TOC) in the drained peat forests

| Author                       | Location           | Land Use     | Depth (cm) | BD (g cm <sup>-3</sup> ) | TOC (%) |
|------------------------------|--------------------|--------------|------------|--------------------------|---------|
| Wakhid et al. 2017           | Central Kalimantan | Rubber       | 0-50       | 0.20                     | 53.30   |
| Wakhid et al 2017            | Central Kalimantan | Rubber       | 0-50       | 0.23                     | 51.70   |
| Wakhid et al 2017            | Central Kalimantan | Rubber       | 0-50       | 0.23                     | 54.00   |
| Wakhid et al. 2017           | Central Kalimantan | Rubber       | 0-50       | 0.24                     | 30.50   |
| Anshari et al (Under Review) | West Kalimantan    | Various uses | 0-50       | 0.33                     | 40.82   |
| Anshari et al (Under Review) | West Kalimantan    | Various uses | 0-50       | 0.12                     | 54.30   |
| Anshari et al (Under Review) | West Kalimantan    | Various uses | 0-50       | 0.16                     | 57.62   |
| Anshari et al (Under Review) | West Kalimantan    | Various uses | 0-50       | 0.09                     | 55.44   |
| Anshari et al (Under Review) | West Kalimantan    | Various uses | 0-50       | 0.39                     | 23.13   |
| Anshari et al (Under Review) | West Kalimantan    | Various uses | 0-50       | 0.23                     | 45.48   |
| Anshari et al (Under Review) | West Kalimantan    | Various uses | 0-50       | 0.20                     | 53.01   |
| Anshari et al (Under Review) | West Kalimantan    | Various uses | 0-50       | 0.11                     | 53.72   |
| Anshari et al (Under Review) | West Kalimantan    | Various uses | 0-50       | 0.05                     | 55.71   |
| Anshari et al (Under Review) | West Kalimantan    | Various uses | 0-50       | 0.09                     | 55.06   |
| Anshari et al (Under Review) | West Kalimantan    | Various uses | 0-50       | 0.15                     | 54.68   |
| Anshari et al (Under Review) | West Kalimantan    | Various uses | 0-50       | 0.10                     | 52.78   |
| Anshari et al (Under Review) | West Kalimantan    | Various uses | 0-50       | 0.04                     | 57.45   |
| Anshari et al (Under Review) | West Kalimantan    | Various uses | 0-50       | 0.07                     | 55.64   |
| Anshari et al (Under Review) | West Kalimantan    | Various uses | 0-50       | 0.08                     | 57.58   |
| Anshari et al (Under Review) | West Kalimantan    | Various uses | 0-50       | 0.12                     | 51.34   |
| Anshari et al (Under Review) | West Kalimantan    | Various uses | 0-50       | 0.14                     | 55.09   |
| Anshari et al (Under Review) | West Kalimantan    | Various uses | 0-50       | 0.15                     | 56.04   |
| Anshari et al (Under Review) | West Kalimantan    | Various uses | 0-50       | 0.17                     | 55.62   |
| Anshari et al (Under Review) | West Kalimantan    | Various uses | 0-50       | 0.15                     | 56.18   |
| Anshari et al (Under Review) | West Kalimantan    | Various uses | 0-50       | 0.11                     | 53.31   |
| Anshari et al (Under Review) | West Kalimantan    | Various uses | 0-50       | 0.11                     | 53.54   |
| Anshari et al (Under Review) | West Kalimantan    | Various uses | 0-50       | 0.12                     | 51.28   |
| Anshari et al (Under Review) | West Kalimantan    | Various uses | 0-50       | 0.20                     | 54.57   |
| Anshari et al (Under Review) | West Kalimantan    | Various uses | 0-50       | 0.21                     | 35.54   |
| Anshari et al (Under Review) | West Kalimantan    | Various uses | 0-50       | 0.10                     | 57.62   |
| Anshari et al (Under Review) | West Kalimantan    | Various uses | 0-50       | 0.06                     | 55.01   |
| Anshari et al (Under Review) | West Kalimantan    | Various uses | 0-50       | 0.08                     | 57.03   |
| Anshari et al (Under Review) | West Kalimantan    | Various uses | 0-50       | 0.40                     | 21.59   |
| Anshari et al (Under Review) | West Kalimantan    | Various uses | 0-50       | 0.25                     | 35.62   |
| Anshari et al (Under Review) | West Kalimantan    | Various uses | 0-50       | 0.36                     | 20.25   |
| Anshari et al (Under Review) | West Kalimantan    | Various uses | 0-50       | 0.09                     | 54.21   |
| Anshari et al (Under Review) | West Kalimantan    | Various uses | 0-50       | 0.07                     | 54.42   |
| Anshari et al (Under Review) | West Kalimantan    | Various uses | 0-50       | 0.09                     | 54.20   |
| Anshari et al (Under Review) | West Kalimantan    | Various uses | 0-50       | 0.06                     | 56.45   |
| Anshari et al (Under Review) | West Kalimantan    | Various uses | 0-50       | 0.06                     | 55.69   |



| Author                       | Location        | Land Use     | Depth (cm) | BD (g cm <sup>-3</sup> ) | TOC (%) |
|------------------------------|-----------------|--------------|------------|--------------------------|---------|
| Anshari et al (Under Review) | West Kalimantan | Various uses | 0-50       | 0.03                     | 56.96   |
| Anshari et al (Under Review) | West Kalimantan | Various uses | 0-50       | 0.06                     | 58.75   |
| Anshari et al (Under Review) | West Kalimantan | Various uses | 0-50       | 0.09                     | 55.33   |
| Anshari et al (Under Review) | West Kalimantan | Various uses | 0-50       | 0.19                     | 38.21   |
| Anshari et al (Under Review) | West Kalimantan | Various uses | 0-50       | 0.06                     | 54.46   |
| Anshari et al (Under Review) | West Kalimantan | Various uses | 0-50       | 0.13                     | 57.54   |
| Anshari et al (Under Review) | West Kalimantan | Various uses | 0-50       | 0.11                     | 57.59   |
| Anshari et al (Under Review) | West Kalimantan | Various uses | 0-50       | 0.22                     | 46.76   |
| Anshari et al (Under Review) | West Kalimantan | Various uses | 0-50       | 0.11                     | 56.20   |
| Anshari et al (Under Review) | West Kalimantan | Various uses | 0-50       | 0.11                     | 54.79   |
| Anshari et al (Under Review) | West Kalimantan | Various uses | 0-50       | 0.09                     | 55.58   |
| Anshari et al (Under Review) | West Kalimantan | Various uses | 0-50       | 0.08                     | 54.66   |
| Anshari et al (Under Review) | West Kalimantan | Various uses | 0-50       | 0.16                     | 49.00   |
| Anshari et al (Under Review) | West Kalimantan | Various uses | 0-50       | 0.14                     | 55.02   |
| Anshari et al (Under Review) | West Kalimantan | Various uses | 0-50       | 0.11                     | 53.40   |
| Anshari et al (Under Review) | West Kalimantan | Various uses | 0-50       | 0.10                     | 52.67   |
| Anshari et al (Under Review) | West Kalimantan | Various uses | 0-50       | 0.20                     | 39.06   |
| Anshari et al (Under Review) | West Kalimantan | Various uses | 0-50       | 0.19                     | 45.38   |
| Anshari et al (Under Review) | West Kalimantan | Various uses | 0-50       | 0.15                     | 50.45   |
| Anshari et al (Under Review) | West Kalimantan | Various uses | 0-50       | 0.12                     | 51.20   |
| Anshari et al (Under Review) | West Kalimantan | Various uses | 0-50       | 0.09                     | 55.14   |
| Anshari et al (Under Review) | West Kalimantan | Various uses | 0-50       | 0.09                     | 52.11   |
| Anshari et al (Under Review) | West Kalimantan | Various uses | 0-50       | 0.13                     | 59.69   |
| Anshari et al (Under Review) | West Kalimantan | Various uses | 0-50       | 0.13                     | 50.78   |
| Anshari et al (Under Review) | West Kalimantan | Various uses | 0-50       | 0.12                     | 45.20   |
| Anshari et al (Under Review) | West Kalimantan | Various uses | 0-50       | 0.09                     | 49.45   |
| Anshari et al (Under Review) | West Kalimantan | Various uses | 0-50       | 0.12                     | 52.59   |
| Anshari et al (Under Review) | West Kalimantan | Various uses | 0-50       | 0.14                     | 54.57   |
| Anshari et al (Under Review) | West Kalimantan | Various uses | 0-50       | 0.22                     | 58.33   |
| Anshari et al (Under Review) | West Kalimantan | Various uses | 0-50       | 0.15                     | 51.72   |
| Anshari et al (Under Review) | West Kalimantan | Various uses | 0-50       | 0.14                     | 50.81   |
| Anshari et al (Under Review) | West Kalimantan | Various uses | 0-50       | 0.17                     | 51.52   |
| Anshari et al (Under Review) | West Kalimantan | Various uses | 0-50       | 0.13                     | 48.78   |
| Anshari et al (Under Review) | West Kalimantan | Various uses | 0-50       | 0.14                     | 45.88   |
| Anshari et al (Under Review) | West Kalimantan | Various uses | 0-50       | 0.15                     | 46.70   |
| Anshari et al (Under Review) | West Kalimantan | Various uses | 0-50       | 0.13                     | 55.44   |
| Anshari et al (Under Review) | West Kalimantan | Various uses | 0-50       | 0.17                     | 36.03   |
| Anshari et al (Under Review) | West Kalimantan | Various uses | 0-50       | 0.12                     | 56.82   |
| Anshari et al (Under Review) | West Kalimantan | Various uses | 0-50       | 0.09                     | 53.44   |
| Anshari et al (Under Review) | West Kalimantan | Various uses | 0-50       | 0.10                     | 53.32   |
| Anshari et al (Under Review) | West Kalimantan | Various uses | 0-50       | 0.21                     | 34.36   |
| Anshari et al (Under Review) | West Kalimantan | Various uses | 0-50       | 0.25                     | 32.37   |

| Author                       | Location           | Land Use     | Depth (cm) | BD (g cm <sup>-3</sup> ) | TOC (%) |
|------------------------------|--------------------|--------------|------------|--------------------------|---------|
| Anshari et al (Under Review) | West Kalimantan    | Various uses | 0-50       | 0.26                     | 36.89   |
| Anshari et al (Under Review) | West Kalimantan    | Various uses | 0-50       | 0.20                     | 33.40   |
| Anshari et al (Under Review) | West Kalimantan    | Various uses | 0-50       | 0.10                     | 45.79   |
| Anshari et al (Under Review) | West Kalimantan    | Various uses | 0-50       | 0.09                     | 51.20   |
| Anshari et al (Under Review) | West Kalimantan    | Various uses | 0-50       | 0.08                     | 51.67   |
| Anshari et al (Under Review) | West Kalimantan    | Various uses | 0-50       | 0.13                     | 52.06   |
| Anshari et al (Under Review) | West Kalimantan    | Various uses | 0-50       | 0.13                     | 44.87   |
| Anshari et al (Under Review) | West Kalimantan    | Various uses | 0-50       | 0.07                     | 54.49   |
| Anshari et al (Under Review) | West Kalimantan    | Various uses | 0-50       | 0.09                     | 48.75   |
| Anshari et al (Under Review) | West Kalimantan    | Various uses | 0-50       | 0.09                     | 49.01   |
| Anshari et al (Under Review) | West Kalimantan    | Various uses | 0-50       | 0.07                     | 54.29   |
| Anshari et al (Under Review) | West Kalimantan    | Various uses | 0-50       | 0.08                     | 57.36   |
| Anshari et al (Under Review) | West Kalimantan    | Various uses | 0-50       | 0.13                     | 54.56   |
| Anshari et al (Under Review) | West Kalimantan    | Various uses | 0-50       | 0.07                     | 49.96   |
| Anshari et al (Under Review) | West Kalimantan    | Various uses | 0-50       | 0.10                     | 49.43   |
| Anshari et al (Under Review) | West Kalimantan    | Various uses | 0-50       | 0.10                     | 49.73   |
| Anshari et al (Under Review) | West Kalimantan    | Various uses | 0-50       | 0.11                     | 49.56   |
| Anshari et al (Under Review) | West Kalimantan    | Various uses | 0-50       | 0.10                     | 54.67   |
| Wakhid et al 2017            | Central Kalimantan | Rubber       | 50-100     | 0.25                     | 33.00   |
| Wakhid et al 2017            | Central Kalimantan | Rubber       | 50-100     | 0.24                     | 34.00   |
| Anshari et al (Under Review) | West Kalimantan    | Various uses | 50-100     | 0.14                     | 59.41   |
| Anshari et al (Under Review) | West Kalimantan    | Various uses | 50-100     | 0.09                     | 59.14   |
| Anshari et al (Under Review) | West Kalimantan    | Various uses | 50-100     | 0.10                     | 57.03   |
| Anshari et al (Under Review) | West Kalimantan    | Various uses | 50-100     | 0.27                     | 32.98   |
| Anshari et al (Under Review) | West Kalimantan    | Various uses | 50-100     | 0.41                     | 15.22   |
| Anshari et al (Under Review) | West Kalimantan    | Various uses | 50-100     | 0.12                     | 54.88   |
| Anshari et al (Under Review) | West Kalimantan    | Various uses | 50-100     | 0.05                     | 54.30   |
| Anshari et al (Under Review) | West Kalimantan    | Various uses | 50-100     | 0.09                     | 57.34   |
| Anshari et al (Under Review) | West Kalimantan    | Various uses | 50-100     | 0.06                     | 54.42   |
| Anshari et al (Under Review) | West Kalimantan    | Various uses | 50-100     | 0.08                     | 55.98   |
| Anshari et al (Under Review) | West Kalimantan    | Various uses | 50-100     | 0.07                     | 57.69   |
| Anshari et al (Under Review) | West Kalimantan    | Various uses | 50-100     | 0.09                     | 55.13   |
| Anshari et al (Under Review) | West Kalimantan    | Various uses | 50-100     | 0.13                     | 43.28   |
| Anshari et al (Under Review) | West Kalimantan    | Various uses | 50-100     | 0.08                     | 59.06   |
| Anshari et al (Under Review) | West Kalimantan    | Various uses | 50-100     | 0.10                     | 59.82   |
| Anshari et al (Under Review) | West Kalimantan    | Various uses | 50-100     | 0.10                     | 58.72   |
| Anshari et al (Under Review) | West Kalimantan    | Various uses | 50-100     | 0.21                     | 42.79   |
| Anshari et al (Under Review) | West Kalimantan    | Various uses | 50-100     | 0.09                     | 56.49   |
| Anshari et al (Under Review) | West Kalimantan    | Various uses | 50-100     | 0.08                     | 56.09   |
| Anshari et al (Under Review) | West Kalimantan    | Various uses | 50-100     | 0.08                     | 57.72   |
| Anshari et al (Under Review) | West Kalimantan    | Various uses | 50-100     | 0.09                     | 52.88   |
| Anshari et al (Under Review) | West Kalimantan    | Various uses | 50-100     | 0.06                     | 56.60   |

| Author                       | Location        | Land Use     | Depth (cm) | BD (g cm <sup>-3</sup> ) | TOC (%) |
|------------------------------|-----------------|--------------|------------|--------------------------|---------|
| Anshari et al (Under Review) | West Kalimantan | Various uses | 50-100     | 0.12                     | 55.98   |
| Anshari et al (Under Review) | West Kalimantan | Various uses | 50-100     | 0.07                     | 57.86   |
| Anshari et al (Under Review) | West Kalimantan | Various uses | 50-100     | 0.26                     | 32.27   |
| Anshari et al (Under Review) | West Kalimantan | Various uses | 50-100     | 0.07                     | 55.15   |
| Anshari et al (Under Review) | West Kalimantan | Various uses | 50-100     | 0.06                     | 57.94   |
| Anshari et al (Under Review) | West Kalimantan | Various uses | 50-100     | 0.11                     | 57.08   |
| Anshari et al (Under Review) | West Kalimantan | Various uses | 50-100     | 0.07                     | 56.21   |
| Anshari et al (Under Review) | West Kalimantan | Various uses | 50-100     | 0.07                     | 58.66   |
| Anshari et al (Under Review) | West Kalimantan | Various uses | 50-100     | 0.06                     | 60.86   |
| Anshari et al (Under Review) | West Kalimantan | Various uses | 50-100     | 0.03                     | 57.78   |
| Anshari et al (Under Review) | West Kalimantan | Various uses | 50-100     | 0.10                     | 59.98   |
| Anshari et al (Under Review) | West Kalimantan | Various uses | 50-100     | 0.10                     | 57.77   |
| Anshari et al (Under Review) | West Kalimantan | Various uses | 50-100     | 0.11                     | 54.97   |
| Anshari et al (Under Review) | West Kalimantan | Various uses | 50-100     | 0.18                     | 43.73   |
| Anshari et al (Under Review) | West Kalimantan | Various uses | 50-100     | 0.10                     | 56.86   |
| Anshari et al (Under Review) | West Kalimantan | Various uses | 50-100     | 0.14                     | 59.09   |
| Anshari et al (Under Review) | West Kalimantan | Various uses | 50-100     | 0.11                     | 56.96   |
| Anshari et al (Under Review) | West Kalimantan | Various uses | 50-100     | 0.07                     | 57.96   |
| Anshari et al (Under Review) | West Kalimantan | Various uses | 50-100     | 0.07                     | 53.31   |
| Anshari et al (Under Review) | West Kalimantan | Various uses | 50-100     | 0.13                     | 55.32   |
| Anshari et al (Under Review) | West Kalimantan | Various uses | 50-100     | 0.09                     | 53.92   |
| Anshari et al (Under Review) | West Kalimantan | Various uses | 50-100     | 0.24                     | 35.83   |
| Anshari et al (Under Review) | West Kalimantan | Various uses | 50-100     | 0.09                     | 50.13   |
| Anshari et al (Under Review) | West Kalimantan | Various uses | 50-100     | 0.08                     | 50.60   |
| Anshari et al (Under Review) | West Kalimantan | Various uses | 50-100     | 0.09                     | 49.60   |
| Anshari et al (Under Review) | West Kalimantan | Various uses | 50-100     | 0.11                     | 51.84   |
| Anshari et al (Under Review) | West Kalimantan | Various uses | 50-100     | 0.10                     | 54.92   |
| Anshari et al (Under Review) | West Kalimantan | Various uses | 50-100     | 0.09                     | 49.56   |
| Anshari et al (Under Review) | West Kalimantan | Various uses | 50-100     | 0.08                     | 51.91   |
| Anshari et al (Under Review) | West Kalimantan | Various uses | 50-100     | 0.08                     | 54.47   |
| Anshari et al (Under Review) | West Kalimantan | Various uses | 50-100     | 0.34                     | 24.18   |
| Anshari et al (Under Review) | West Kalimantan | Various uses | 50-100     | 0.13                     | 57.48   |
| Anshari et al (Under Review) | West Kalimantan | Various uses | 50-100     | 0.09                     | 54.42   |
| Anshari et al (Under Review) | West Kalimantan | Various uses | 50-100     | 0.09                     | 52.20   |
| Anshari et al (Under Review) | West Kalimantan | Various uses | 50-100     | 0.25                     | 33.12   |
| Anshari et al (Under Review) | West Kalimantan | Various uses | 50-100     | 0.08                     | 49.63   |
| Anshari et al (Under Review) | West Kalimantan | Various uses | 50-100     | 0.07                     | 51.08   |
| Anshari et al (Under Review) | West Kalimantan | Various uses | 50-100     | 0.09                     | 50.75   |
| Anshari et al (Under Review) | West Kalimantan | Various uses | 50-100     | 0.05                     | 56.49   |
| Anshari et al (Under Review) | West Kalimantan | Various uses | 50-100     | 0.09                     | 54.44   |
| Anshari et al (Under Review) | West Kalimantan | Various uses | 50-100     | 0.08                     | 56.57   |
| Anshari et al (Under Review) | West Kalimantan | Various uses | 50-100     | 0.11                     | 53.47   |

| Author                       | Location        | Land Use     | Depth (cm) | BD (g cm <sup>-3</sup> ) | TOC (%) |
|------------------------------|-----------------|--------------|------------|--------------------------|---------|
| Anshari et al (Under Review) | West Kalimantan | Various uses | 50-100     | 0.21                     | 34.61   |
| Anshari et al (Under Review) | West Kalimantan | Various uses | 50-100     | 0.10                     | 49.61   |
| Anshari et al (Under Review) | West Kalimantan | Various uses | 50-100     | 0.08                     | 52.04   |
| Anshari et al (Under Review) | West Kalimantan | Various uses | 50-100     | 0.06                     | 52.50   |
| Anshari et al (Under Review) | West Kalimantan | Various uses | 50-100     | 0.06                     | 52.97   |
| Anshari et al (Under Review) | West Kalimantan | Various uses | 50-100     | 0.09                     | 50.76   |
| Anshari et al (Under Review) | West Kalimantan | Various uses | 50-100     | 0.07                     | 51.66   |
| Anshari et al (Under Review) | West Kalimantan | Various uses | 50-100     | 0.07                     | 54.83   |
| Anshari et al (Under Review) | West Kalimantan | Various uses | 50-100     | 0.07                     | 57.75   |
| Anshari et al (Under Review) | West Kalimantan | Various uses | 50-100     | 0.09                     | 54.15   |
| Anshari et al (Under Review) | West Kalimantan | Various uses | 50-100     | 0.10                     | 39.48   |
| Anshari et al (Under Review) | West Kalimantan | Various uses | 50-100     | 0.24                     | 32.03   |
| Anshari et al (Under Review) | West Kalimantan | Various uses | 50-100     | 0.12                     | 50.09   |
| Anshari et al (Under Review) | West Kalimantan | Various uses | 50-100     | 0.08                     | 52.58   |
| Anshari et al (Under Review) | West Kalimantan | Various uses | 50-100     | 0.06                     | 50.64   |
| Anshari et al (Under Review) | West Kalimantan | Various uses | 50-100     | 0.07                     | 55.41   |
| Anshari et al (Under Review) | West Kalimantan | Various uses | 100-150    | 0.07                     | 56.98   |
| Anshari et al (Under Review) | West Kalimantan | Various uses | 100-150    | 0.11                     | 56.82   |
| Anshari et al (Under Review) | West Kalimantan | Various uses | 100-150    | 0.07                     | 56.94   |
| Anshari et al (Under Review) | West Kalimantan | Various uses | 100-150    | 0.08                     | 56.43   |
| Anshari et al (Under Review) | West Kalimantan | Various uses | 100-150    | 0.07                     | 60.58   |
| Anshari et al (Under Review) | West Kalimantan | Various uses | 100-150    | 0.06                     | 55.36   |
| Anshari et al (Under Review) | West Kalimantan | Various uses | 100-150    | 0.07                     | 58.15   |
| Anshari et al (Under Review) | West Kalimantan | Various uses | 100-150    | 0.11                     | 57.35   |
| Anshari et al (Under Review) | West Kalimantan | Various uses | 100-150    | 0.24                     | 26.75   |
| Anshari et al (Under Review) | West Kalimantan | Various uses | 100-150    | 0.19                     | 34.90   |
| Anshari et al (Under Review) | West Kalimantan | Various uses | 100-150    | 0.09                     | 58.07   |
| Anshari et al (Under Review) | West Kalimantan | Various uses | 100-150    | 0.10                     | 59.82   |
| Anshari et al (Under Review) | West Kalimantan | Various uses | 100-150    | 0.08                     | 58.05   |
| Anshari et al (Under Review) | West Kalimantan | Various uses | 100-150    | 0.07                     | 55.40   |
| Anshari et al (Under Review) | West Kalimantan | Various uses | 100-150    | 0.06                     | 58.20   |
| Anshari et al (Under Review) | West Kalimantan | Various uses | 100-150    | 0.07                     | 54.00   |
| Anshari et al (Under Review) | West Kalimantan | Various uses | 100-150    | 0.12                     | 60.02   |
| Anshari et al (Under Review) | West Kalimantan | Various uses | 100-150    | 0.51                     | 15.00   |
| Anshari et al (Under Review) | West Kalimantan | Various uses | 100-150    | 0.07                     | 59.60   |
| Anshari et al (Under Review) | West Kalimantan | Various uses | 100-150    | 0.07                     | 59.16   |
| Anshari et al (Under Review) | West Kalimantan | Various uses | 100-150    | 0.12                     | 56.41   |
| Anshari et al (Under Review) | West Kalimantan | Various uses | 100-150    | 0.08                     | 54.95   |
| Anshari et al (Under Review) | West Kalimantan | Various uses | 100-150    | 0.06                     | 60.27   |
| Anshari et al (Under Review) | West Kalimantan | Various uses | 100-150    | 0.05                     | 55.66   |
| Anshari et al (Under Review) | West Kalimantan | Various uses | 100-150    | 0.07                     | 58.90   |
| Anshari et al (Under Review) | West Kalimantan | Various uses | 100-150    | 0.06                     | 54.89   |

| Author                       | Location        | Land Use     | Depth (cm) | BD (g cm <sup>-3</sup> ) | TOC (%) |
|------------------------------|-----------------|--------------|------------|--------------------------|---------|
| Anshari et al (Under Review) | West Kalimantan | Various uses | 100-150    | 0.10                     | 55.50   |
| Anshari et al (Under Review) | West Kalimantan | Various uses | 100-150    | 0.10                     | 55.72   |
| Anshari et al (Under Review) | West Kalimantan | Various uses | 100-150    | 0.09                     | 59.87   |
| Anshari et al (Under Review) | West Kalimantan | Various uses | 100-150    | 0.11                     | 56.11   |
| Anshari et al (Under Review) | West Kalimantan | Various uses | 100-150    | 0.07                     | 58.99   |
| Anshari et al (Under Review) | West Kalimantan | Various uses | 100-150    | 0.21                     | 38.41   |
| Anshari et al (Under Review) | West Kalimantan | Various uses | 100-150    | 0.05                     | 56.66   |
| Anshari et al (Under Review) | West Kalimantan | Various uses | 100-150    | 0.07                     | 56.09   |
| Anshari et al (Under Review) | West Kalimantan | Various uses | 100-150    | 0.10                     | 53.56   |
| Anshari et al (Under Review) | West Kalimantan | Various uses | 100-150    | 0.09                     | 54.29   |
| Anshari et al (Under Review) | West Kalimantan | Various uses | 100-150    | 0.08                     | 59.35   |
| Anshari et al (Under Review) | West Kalimantan | Various uses | 100-150    | 0.11                     | 49.31   |
| Anshari et al (Under Review) | West Kalimantan | Various uses | 100-150    | 0.06                     | 53.32   |
| Anshari et al (Under Review) | West Kalimantan | Various uses | 100-150    | 0.07                     | 59.49   |
| Anshari et al (Under Review) | West Kalimantan | Various uses | 100-150    | 0.09                     | 55.55   |
| Anshari et al (Under Review) | West Kalimantan | Various uses | 100-150    | 0.07                     | 50.18   |
| Anshari et al (Under Review) | West Kalimantan | Various uses | 100-150    | 0.07                     | 49.97   |
| Anshari et al (Under Review) | West Kalimantan | Various uses | 100-150    | 0.09                     | 52.95   |
| Anshari et al (Under Review) | West Kalimantan | Various uses | 100-150    | 0.09                     | 57.74   |
| Anshari et al (Under Review) | West Kalimantan | Various uses | 100-150    | 0.08                     | 53.25   |
| Anshari et al (Under Review) | West Kalimantan | Various uses | 100-150    | 0.22                     | 30.83   |
| Anshari et al (Under Review) | West Kalimantan | Various uses | 100-150    | 0.23                     | 27.53   |
| Anshari et al (Under Review) | West Kalimantan | Various uses | 100-150    | 0.13                     | 50.28   |
| Anshari et al (Under Review) | West Kalimantan | Various uses | 100-150    | 0.11                     | 50.85   |
| Anshari et al (Under Review) | West Kalimantan | Various uses | 100-150    | 0.09                     | 51.15   |
| Anshari et al (Under Review) | West Kalimantan | Various uses | 100-150    | 0.08                     | 53.81   |
| Anshari et al (Under Review) | West Kalimantan | Various uses | 100-150    | 0.07                     | 52.50   |
| Anshari et al (Under Review) | West Kalimantan | Various uses | 100-150    | 0.07                     | 54.65   |
| Anshari et al (Under Review) | West Kalimantan | Various uses | 100-150    | 0.13                     | 62.94   |
| Anshari et al (Under Review) | West Kalimantan | Various uses | 100-150    | 0.21                     | 33.67   |
| Anshari et al (Under Review) | West Kalimantan | Various uses | 100-150    | 0.05                     | 55.35   |
| Anshari et al (Under Review) | West Kalimantan | Various uses | 100-150    | 0.08                     | 54.49   |
| Anshari et al (Under Review) | West Kalimantan | Various uses | 100-150    | 0.10                     | 58.16   |
| Anshari et al (Under Review) | West Kalimantan | Various uses | 100-150    | 0.08                     | 50.26   |
| Anshari et al (Under Review) | West Kalimantan | Various uses | 100-150    | 0.07                     | 49.63   |
| Anshari et al (Under Review) | West Kalimantan | Various uses | 100-150    | 0.07                     | 52.51   |
| Anshari et al (Under Review) | West Kalimantan | Various uses | 100-150    | 0.08                     | 56.88   |
| Anshari et al (Under Review) | West Kalimantan | Various uses | 100-150    | 0.06                     | 56.32   |
| Anshari et al (Under Review) | West Kalimantan | Various uses | 100-150    | 0.06                     | 49.73   |
| Anshari et al (Under Review) | West Kalimantan | Various uses | 100-150    | 0.04                     | 51.27   |
| Anshari et al (Under Review) | West Kalimantan | Various uses | 100-150    | 0.07                     | 50.68   |
| Anshari et al (Under Review) | West Kalimantan | Various uses | 100-150    | 0.08                     | 56.44   |

| Author                       | Location        | Land Use     | Depth (cm) | BD (g cm <sup>-3</sup> ) | TOC (%) |
|------------------------------|-----------------|--------------|------------|--------------------------|---------|
| Anshari et al (Under Review) | West Kalimantan | Various uses | 150-200    | 0.09                     | 57.57   |
| Anshari et al (Under Review) | West Kalimantan | Various uses | 150-200    | 0.10                     | 54.10   |
| Anshari et al (Under Review) | West Kalimantan | Various uses | 150-200    | 0.08                     | 57.81   |
| Anshari et al (Under Review) | West Kalimantan | Various uses | 150-200    | 0.08                     | 60.60   |
| Anshari et al (Under Review) | West Kalimantan | Various uses | 150-200    | 0.05                     | 55.36   |
| Anshari et al (Under Review) | West Kalimantan | Various uses | 150-200    | 0.07                     | 57.47   |
| Anshari et al (Under Review) | West Kalimantan | Various uses | 150-200    | 0.07                     | 57.79   |
| Anshari et al (Under Review) | West Kalimantan | Various uses | 150-200    | 0.09                     | 58.25   |
| Anshari et al (Under Review) | West Kalimantan | Various uses | 150-200    | 0.07                     | 56.50   |
| Anshari et al (Under Review) | West Kalimantan | Various uses | 150-200    | 0.09                     | 56.15   |
| Anshari et al (Under Review) | West Kalimantan | Various uses | 150-200    | 0.08                     | 58.04   |
| Anshari et al (Under Review) | West Kalimantan | Various uses | 150-200    | 0.08                     | 55.96   |
| Anshari et al (Under Review) | West Kalimantan | Various uses | 150-200    | 0.11                     | 57.40   |
| Anshari et al (Under Review) | West Kalimantan | Various uses | 150-200    | 0.05                     | 58.93   |
| Anshari et al (Under Review) | West Kalimantan | Various uses | 150-200    | 0.11                     | 58.03   |
| Anshari et al (Under Review) | West Kalimantan | Various uses | 150-200    | 0.11                     | 57.37   |
| Anshari et al (Under Review) | West Kalimantan | Various uses | 150-200    | 0.11                     | 59.60   |
| Anshari et al (Under Review) | West Kalimantan | Various uses | 150-200    | 0.07                     | 56.89   |
| Anshari et al (Under Review) | West Kalimantan | Various uses | 150-200    | 0.08                     | 55.24   |
| Anshari et al (Under Review) | West Kalimantan | Various uses | 150-200    | 0.06                     | 57.19   |
| Anshari et al (Under Review) | West Kalimantan | Various uses | 150-200    | 0.09                     | 57.04   |
| Anshari et al (Under Review) | West Kalimantan | Various uses | 150-200    | 0.05                     | 57.03   |
| Anshari et al (Under Review) | West Kalimantan | Various uses | 150-200    | 0.07                     | 55.42   |
| Anshari et al (Under Review) | West Kalimantan | Various uses | 150-200    | 0.08                     | 57.29   |
| Anshari et al (Under Review) | West Kalimantan | Various uses | 150-200    | 0.09                     | 56.05   |
| Anshari et al (Under Review) | West Kalimantan | Various uses | 150-200    | 0.10                     | 54.96   |
| Anshari et al (Under Review) | West Kalimantan | Various uses | 150-200    | 0.10                     | 57.54   |
| Anshari et al (Under Review) | West Kalimantan | Various uses | 150-200    | 0.06                     | 58.33   |
| Anshari et al (Under Review) | West Kalimantan | Various uses | 150-200    | 0.14                     | 46.51   |
| Anshari et al (Under Review) | West Kalimantan | Various uses | 150-200    | 0.10                     | 52.66   |
| Anshari et al (Under Review) | West Kalimantan | Various uses | 150-200    | 0.08                     | 54.92   |
| Anshari et al (Under Review) | West Kalimantan | Various uses | 150-200    | 0.13                     | 56.91   |
| Anshari et al (Under Review) | West Kalimantan | Various uses | 150-200    | 0.09                     | 57.20   |
| Anshari et al (Under Review) | West Kalimantan | Various uses | 150-200    | 0.07                     | 52.95   |
| Anshari et al (Under Review) | West Kalimantan | Various uses | 150-200    | 0.10                     | 59.05   |
| Anshari et al (Under Review) | West Kalimantan | Various uses | 150-200    | 0.06                     | 49.30   |
| Anshari et al (Under Review) | West Kalimantan | Various uses | 150-200    | 0.07                     | 50.08   |
| Anshari et al (Under Review) | West Kalimantan | Various uses | 150-200    | 0.08                     | 50.30   |
| Anshari et al (Under Review) | West Kalimantan | Various uses | 150-200    | 0.09                     | 57.08   |
| Anshari et al (Under Review) | West Kalimantan | Various uses | 150-200    | 0.10                     | 58.69   |
| Anshari et al (Under Review) | West Kalimantan | Various uses | 150-200    | 0.10                     | 50.04   |
| Anshari et al (Under Review) | West Kalimantan | Various uses | 150-200    | 0.07                     | 51.85   |

| Author                       | Location        | Land Use     | Depth (cm) | BD (g cm <sup>-3</sup> ) | TOC (%) |
|------------------------------|-----------------|--------------|------------|--------------------------|---------|
| Anshari et al (Under Review) | West Kalimantan | Various uses | 150-200    | 0.08                     | 50.41   |
| Anshari et al (Under Review) | West Kalimantan | Various uses | 150-200    | 0.15                     | 47.63   |
| Anshari et al (Under Review) | West Kalimantan | Various uses | 150-200    | 0.10                     | 52.84   |
| Anshari et al (Under Review) | West Kalimantan | Various uses | 150-200    | 0.09                     | 54.09   |
| Anshari et al (Under Review) | West Kalimantan | Various uses | 150-200    | 0.13                     | 54.77   |
| Anshari et al (Under Review) | West Kalimantan | Various uses | 150-200    | 0.04                     | 53.84   |
| Anshari et al (Under Review) | West Kalimantan | Various uses | 150-200    | 0.07                     | 56.14   |
| Anshari et al (Under Review) | West Kalimantan | Various uses | 150-200    | 0.10                     | 50.22   |
| Anshari et al (Under Review) | West Kalimantan | Various uses | 150-200    | 0.12                     | 47.16   |
| Anshari et al (Under Review) | West Kalimantan | Various uses | 150-200    | 0.08                     | 52.03   |
| Anshari et al (Under Review) | West Kalimantan | Various uses | 150-200    | 0.08                     | 57.62   |
| Anshari et al (Under Review) | West Kalimantan | Various uses | 150-200    | 0.06                     | 48.48   |
| Anshari et al (Under Review) | West Kalimantan | Various uses | 150-200    | 0.11                     | 50.32   |
| Anshari et al (Under Review) | West Kalimantan | Various uses | 150-200    | 0.08                     | 51.71   |
| Anshari et al (Under Review) | West Kalimantan | Various uses | 150-200    | 0.08                     | 50.59   |
| Anshari et al (Under Review) | West Kalimantan | Various uses | 150-200    | 0.15                     | 56.83   |

**Table S3.** Total and heterotrophic CO<sub>2</sub> emissions from different land use systems of peatland in Indonesia

| Land use                              | Mean ground water<br>table (cm) | C emission (Mg CO <sub>2e</sub> ha <sup>-1</sup> yr <sup>-1</sup> ) |               | Method                                | Source     |
|---------------------------------------|---------------------------------|---------------------------------------------------------------------|---------------|---------------------------------------|------------|
|                                       |                                 | Total                                                               | Heterotrophic |                                       |            |
| Forest                                | -4.7 ± 0.9                      | 47.3 ± 1.1                                                          | 26.1 ± 1.5    | Closed chamber                        | [107]      |
| Rubber                                | -37                             |                                                                     | 42.6          | Trenching, closed<br>chamber          | [71]       |
| Ginger                                | -22                             | 34.4                                                                |               | Closed chamber                        | [71]       |
| Community oil palm                    | -36                             |                                                                     | 35.9          | Trenching, closed<br>chamber          | [71]       |
| Community Oil palm                    | -39                             | 44                                                                  |               | Closed chamber                        | [95]       |
| Peat Swamp forest                     | -9                              | 54                                                                  |               | Closed chamber                        | [95]       |
| Community oil palm                    | -40                             | 121                                                                 |               | Subsidence (4.7 cm yr <sup>-1</sup> ) | [72]       |
| Degraded peat forest                  | -40                             | 40                                                                  |               | Subsidence (1.8 cm yr <sup>-1</sup> ) | [72]       |
| Rubber agroforest                     | -40                             | 79                                                                  |               | Subsidence (2.7 cm yr <sup>-1</sup> ) | [72]       |
| Forest                                | -50 to 30                       | 43.4 ± 2.1                                                          | 20.8 ± 1.3    | Closed chamber                        | [108]      |
| Forest                                | - 2.3 ± 3.5                     | 31.5 ± 3.5                                                          |               | Closed chamber                        | [109]      |
| Forest                                | - 167.9 ± 6.5                   | 134.9 ± 20.1                                                        |               | Closed chamber                        | [109]      |
| Forest                                | - 23.1 ± 6.3                    | 45.2 ± 3.1                                                          |               | Closed chamber                        | [110]      |
| Oil Palm                              | -25.8 ± 1.5                     | 42.9 ± 1.5                                                          | 35.2 ± 2.9    | Closed chamber                        | [107]      |
| Oil Palm                              | -44.7 ± 1.8                     | 50.6 ± 1.1                                                          | 30.8 ± 1.1    | Closed chamber                        | [107]      |
| Oil Palm                              | -89 to -23                      | 37.8 ± 19.5                                                         |               | Closed chamber                        | [61]       |
| Oil Palm                              | -89 to -24                      | 21.7 ± 9.5                                                          |               | Closed chamber                        | [61]       |
| Oil Palm                              | -89 to -25                      |                                                                     | 25.2 ± 7.7    | Closed chamber                        | [61]       |
| Oil Palm                              | -17 to 19                       | 34.0 ± 22.4                                                         | 32.7 ± 17.5   | Closed chamber                        | [111]      |
| Oil Palm                              | - 13.7 ± 3.8                    | 47.3 ± 6.1                                                          |               | Closed chamber                        | [109]      |
| Oil Palm                              | - 227.3 ± 9.0                   | 93.7 ± 12.3                                                         |               | Closed chamber                        | [109]      |
| Oil Palm                              | - 49.9 ± 6.3                    | 61.5 ± 4.8                                                          |               | Closed chamber                        | [110]      |
| Rubber                                | -69                             | 120.9 ± 38.1                                                        | 51.7 ± 7.9    | Closed chamber                        | [56]       |
| Shrubs                                | -50 to 30                       | 52.4 ± 4.1                                                          |               | Closed chamber                        | [108]      |
| Oil Palm                              | -34.52 ± 1.81                   | 67.85 ± 4.99                                                        |               | Closed chamber                        | [112]      |
| Oil Palm                              | -35.49 ± 2.17                   | 61.60 ± 5.1                                                         |               | Closed chamber                        | [112]      |
| Secondary peat forest                 | -60 to -80                      | 14.19 ± 1.09                                                        | 11.12 ± 0.93  | Closed chamber                        | [113]      |
| Undrained former<br>timber concession | -30 to 20                       |                                                                     | 28            | Closed chamber                        | [114]      |
| Oil palm                              | -60                             |                                                                     | 43            | Closed chamber and<br>subsidence      | [6]        |
| All drained peatlands                 | N/A                             |                                                                     | 30-92         | Subsidence (2-6 cm yr <sup>-1</sup> ) | This study |
